# Supplementary material for: Silver decorated nickel–cobalt (oxy)hydroxides fabricated via surface reconstruction engineering for boosted electrocatalytic oxygen evolution and urea oxidation
Source: Royal Society of Chemistry journal article supplement (doi:10.1039/d2dt01485h), 2022-01-01
Supplement: d2dt01485h1.pdf [file d2dt01485h1.pdf]

Electronic Supplementary Information (ESI) for Dalton Transactions  
This journal is © The Royal Society of Chemistry 2022

## Supporting Information

### **Silver decorated nickel-cobalt (oxy)hydroxides fabricated via surface reconstruction engineering for boosted electrocatalytic oxygen evolution and urea oxidation**

Shan-Shan Liu,<sup>a</sup> Xiu-Feng Xu,<sup>\*,c</sup> and Ji-Sen Li<sup>\*,b</sup>

<sup>a</sup> College of Chemistry and Chemical Engineering, Huanggang Normal University, Huanggang 438000, P. R. China

<sup>b</sup> School of Chemistry, Chemical Engineering and Materials, Jining University, Qufu 273155, P. R. China

<sup>c</sup> School of Chemistry and Chemical Engineering, Institute of Applied Catalysis, Yantai University, Yantai 264005, P. R. China

\*Corresponding authors. E-mail: senjili@sina.com (J.-S. Li)

## S1 Figures in Supporting Information

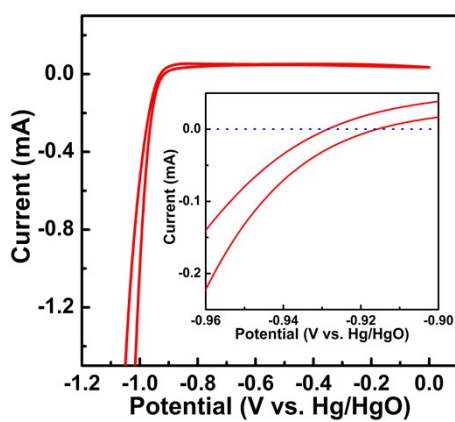

**Fig. S1** CV curves of Hg/HgO electrode calibration in 1.0 M KOH. Inset: the enlarged view.

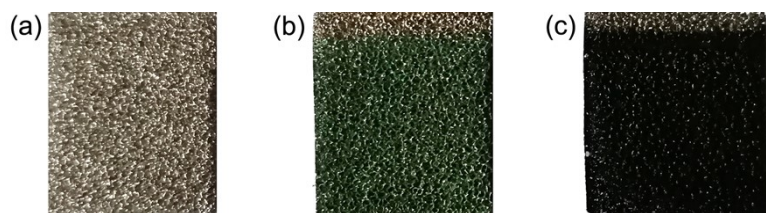

**Fig. S2** Digital images of (a) NF, (b) NiCo LDH/NF, and (c) Ag@NiCo(OH)<sub>x</sub>/NF.

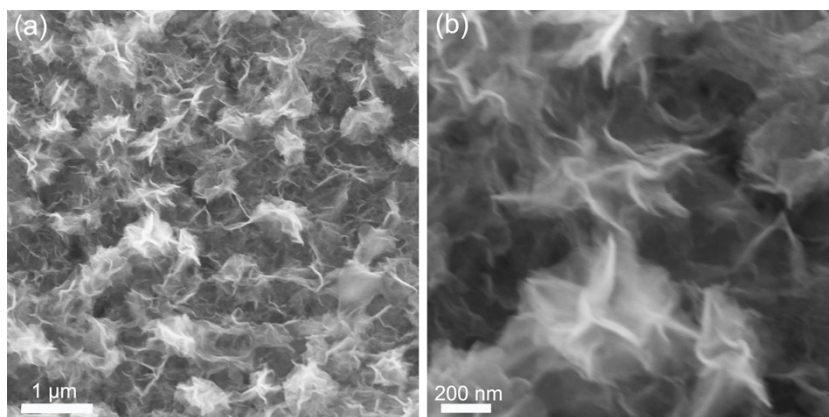

**Fig. S3** (a, b) SEM images of NiCo LDH/NF.

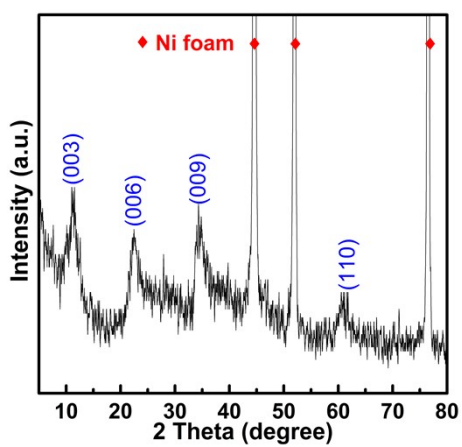

**Fig. S4** PXRD pattern of NiCo LDH/NF.

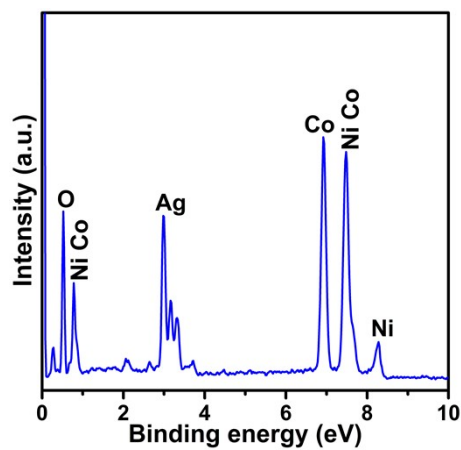

**Fig. S5** EDX spectrum of the Ag@NiCo(OH)<sub>x</sub>/NF.

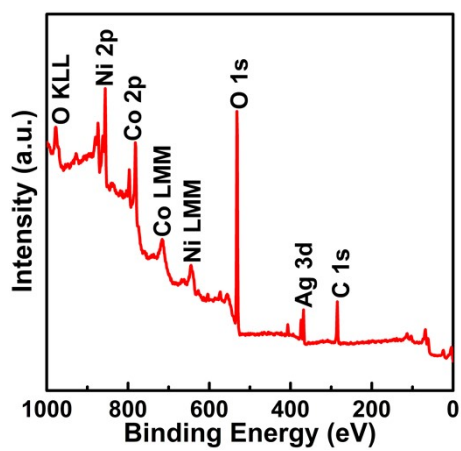

**Fig. S6** XPS survey spectrum of the Ag@NiCo(OH)<sub>x</sub>/NF.

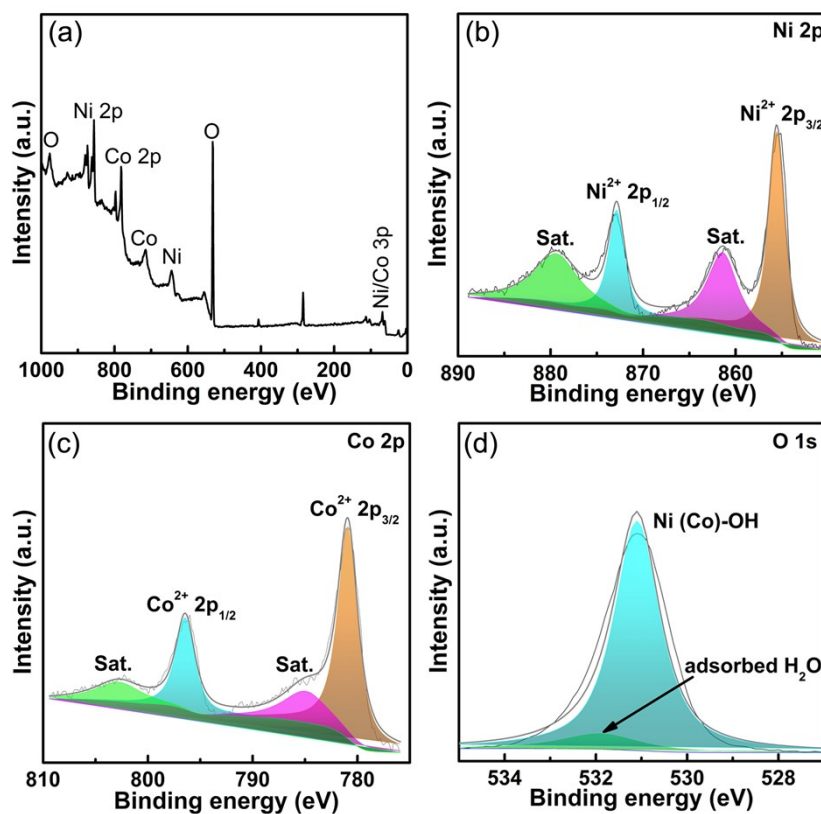

**Fig. S7** (a) XPS survey spectrum, (b-d) high resolution XPS spectra of Ni 2p, Co 2p, and O 1s of NiCo LDH/NF, respectively.

As shown in Fig.S7a, the XPS survey spectrum reveals the existence of Co, Ni, and O elements in NiCo LDH/NF. In the high-resolution Ni 2p spectrum (Fig. S7b), two main peaks for Ni 2p<sub>3/2</sub> and Ni 2p<sub>1/2</sub> located at 855.5 and 872.8 eV are accompanied by two shake-up satellite peaks (861.4 and 879.3 eV), respectively, which are characteristic spin-orbit peaks of Ni<sup>2+</sup> (Fig. S7b). For the Co XPS spectrum in Fig. S7c, the peaks appeared at 780.9 and 796.4 eV are attributed to the Co<sup>2+</sup>. The other peaks (784.9 and 802.8 eV) belong to shakeup satellite peaks. As seen from O 1s XPS spectrum (Fig. S7d), the peaks at 531.1 and 531.9 eV correspond to Ni (Co)-OH and adsorbed H<sub>2</sub>O, respectively.

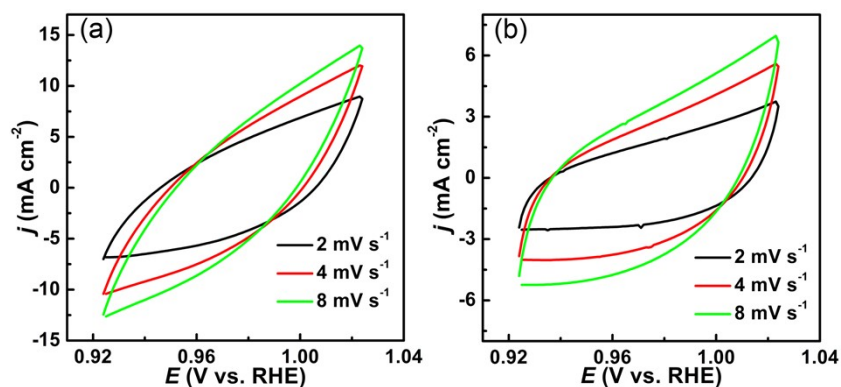

**Fig. S8** Cyclic voltammograms of (a) NiCo LDH/NF and (b) Ag@NiCo(OH)<sub>x</sub>/NF from 0.924 to 1.024 V vs. RHE at different scan rates in 1.0 M KOH aqueous solution.

Calculation of ECSA:

$$ECSA = \frac{C_{dl}}{C_s}$$

$$ECSA_{NiCo\ LDH/NF} = \frac{356.5\ mF\ cm^{-2}}{40\ \mu F\ cm^{-2}} = 8912.5\ cm^{-2}_{ECSA}$$

$$ECSA_{Ag@NiCo(OH)_x/NF} = \frac{434.1\ mF\ cm^{-2}}{40\ \mu F\ cm^{-2}} = 10852.5\ cm^{-2}_{ECSA}$$

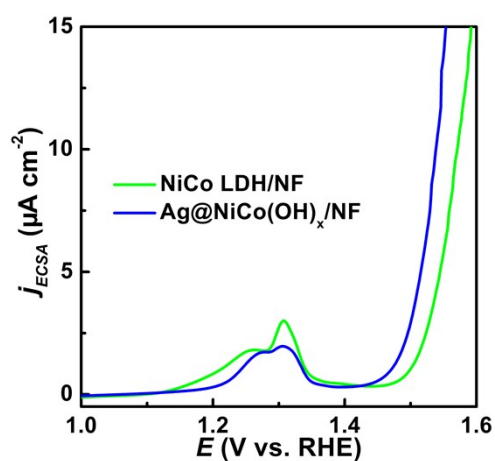

**Fig. S9** LSV curves of NiCo LDH/NF and Ag@NiCo(OH)<sub>x</sub>/NF normalized by C<sub>dl</sub>.

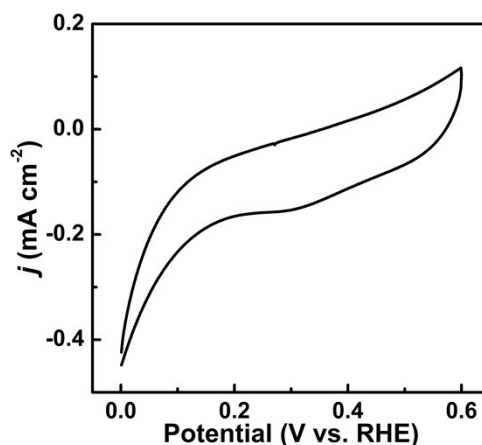

**Fig. S10** CV curve for Ag@NiCo(OH)<sub>x</sub>/NF measured in 1.0 M KOH.

The calculation method of TOF value is according to the following equation:

$$\text{TOF} = \frac{j}{4Fn}$$

where  $j$  is the measured current density ( $\text{A cm}^{-2}$ ) for the OER,  $F$  is the Faraday constant ( $96485 \text{ C mol}^{-1}$ ) and  $n$  is the number of active sites ( $\text{mol cm}^{-2}$ ). The factor  $1/4$  is shown because four electrons are needed to generate one oxygen molecule. The number of active sites is achieved according to cyclic voltammograms (CV) method. Specifically, the CV curve is investigated in 1.0 M KOH solution with the potential window range from 0 V to 0.6 V vs RHE at  $50 \text{ mV s}^{-1}$ . Then, by integrating the CV curve's charge over the whole potential range, the half value of the charge was obtained, which is the value of the surface charge density ( $Q_s$ ).

$$Q_s = Fn$$

In 1.0 M KOH solution, the TOF value of Ag@NiCo(OH)<sub>x</sub>/NF is estimated to be  $0.18 \text{ s}^{-1}$  at an overpotential of 260 mV.

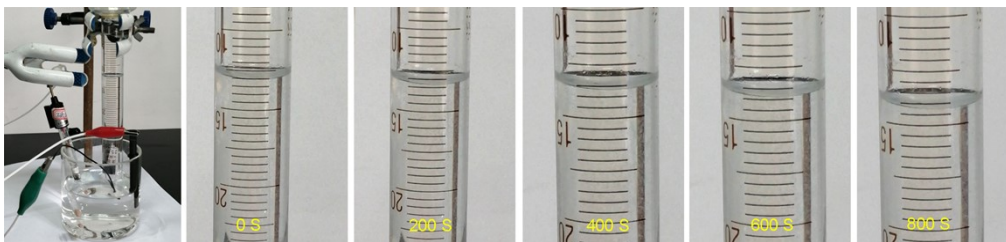

**Fig. S11** Gas collection device for OER and photographs of oxygen collected at different time in 1.0 M KOH.

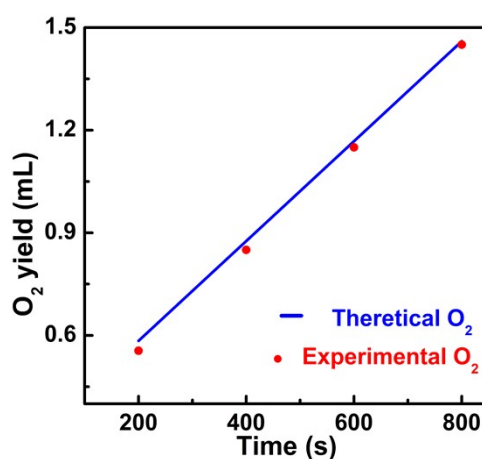

**Fig. S12** Theoretically calculated and experimentally measured amount of oxygen versus time for Ag@NiCo(OH)<sub>x</sub>/NF in 1.0 M KOH.

To estimate the faradaic efficiency (FE), a gas collection device was employed for the experiment (**Fig. S11**). The FE is estimated from the observed gas volume and the theoretical gas volume calculated by the charge passed through the electrode. The related formula is as follows:  $FE = V_{\text{experimental}} / [V_m \times Q / (NF)]$ , where the  $N$  is the number of transferred electrons,  $F$  is the faraday constant ( $96485 \text{ C mol}^{-1}$ ),  $Q$  is the charge passed through the electrode, and  $V_m$  is the gas molar volume at 298 K and 101 kPa ( $24.5 \text{ L mol}^{-1}$ ). As shown in **Fig. S12**, the faradaic efficiency of Ag@NiCo(OH)<sub>x</sub>/NF for the OER is calculated to be 98.1%.



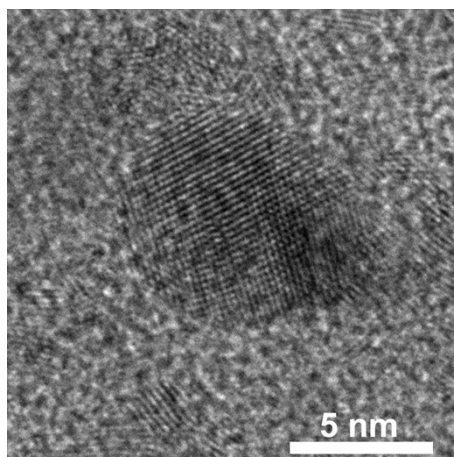

**Fig. S13** HRTEM image of Ag@NiCo(OH)<sub>x</sub>/NF after stability test for OER.

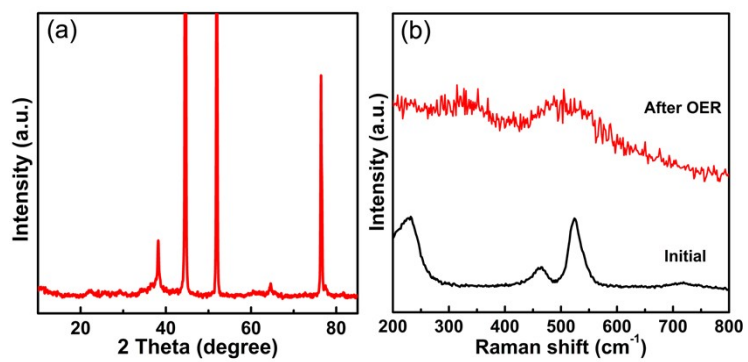

**Fig. S14** (a) PXRD pattern and (b) Raman spectra of Ag@NiCo(OH)<sub>x</sub>/NF after stability test for OER.

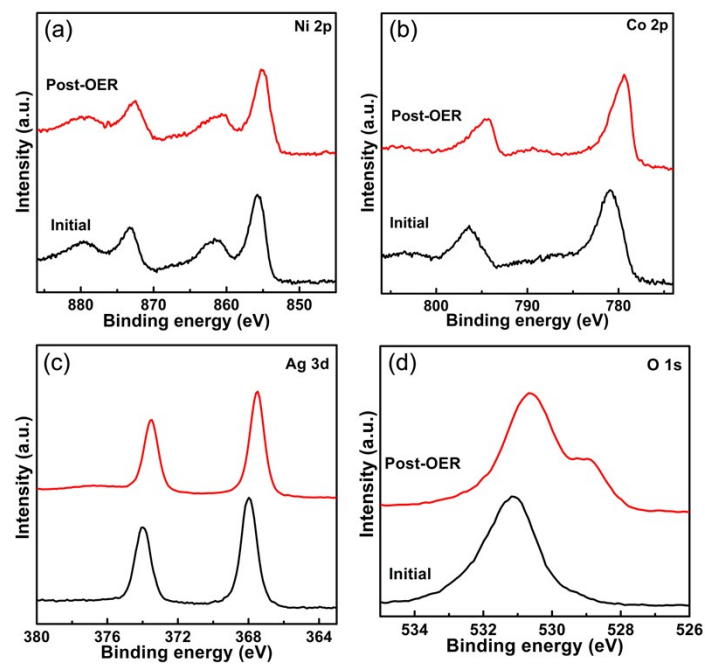

**Fig. S15** (a-d) High-resolution XPS spectra of Ni 2p, Co 2p, Ag 3d, and O 1s for Ag@NiCo(OH)<sub>x</sub>/NF initial and after stability test for OER.

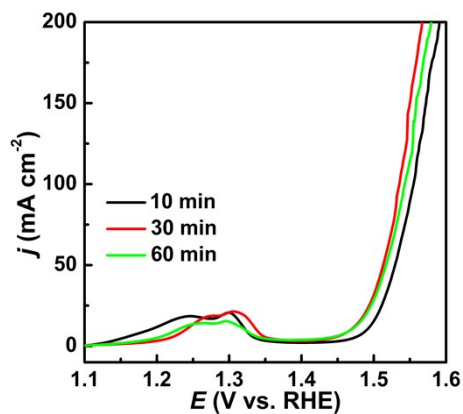

**Fig. S16** (a) LSV curves for the OER of Ag@NiCo(OH)<sub>x</sub>/NF with different immersion time (10, 30, and 60 min).

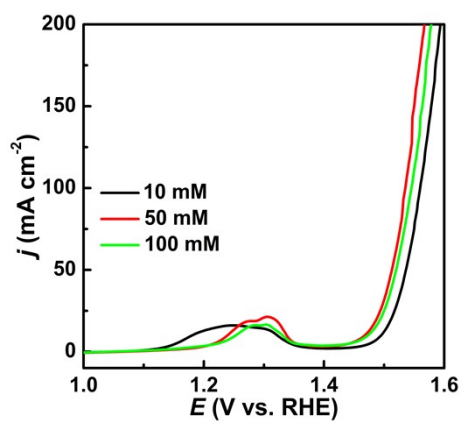

**Fig. S17** (a) LSV curves for the OER of Ag@NiCo(OH)<sub>x</sub>/NF with different concentration of AgNO<sub>3</sub> solution (10, 50, and 100 mM).

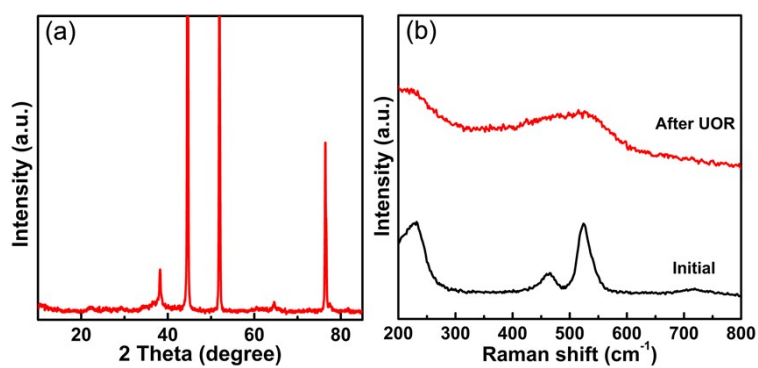

**Fig. S18** (a) PXRD pattern and (b) Raman spectra of Ag@NiCo(OH)<sub>x</sub>/NF after stability test for UOR.

## S2 Tables in Supporting Information

**Table S1.** Comparison of the OER performance of Ag@NiCo(OH)<sub>x</sub>/NF with other reported electrocatalysts.

| Catalysts                               | Tafel slope (mV dec <sup>-1</sup> ) | Overpotential (mV) at 10 mA cm <sup>-2</sup> | References                                   |
|-----------------------------------------|-------------------------------------|----------------------------------------------|----------------------------------------------|
| <b>Ag@NiCo(OH)<sub>x</sub>/NF</b>       | <b>64.6</b>                         | <b>236</b>                                   | <b>This work</b>                             |
| Ag@NiV <sub>0.2</sub> Co <sub>0.2</sub> | 38.2                                | 255                                          | <i>Chem. Eng. J.</i> 2021, 425, 131662.      |
| Ag-doped CoOOH                          | 64.6                                | 256                                          | <i>ACS Catal.</i> 2020, 10, 562–569          |
| Ag NW@NiMn-LDHs(1:2)                    | 40.2                                | 270                                          | <i>ACS Nano</i> 2020, 14, 1770–1782          |
| CoSeP                                   | 87                                  | 255                                          | <i>ACS Energy Lett.</i> 2019, 4, 987.        |
| Fe, Co-NiSe <sub>2</sub>                | 63                                  | 251                                          | <i>Adv. Mater.</i> 2018, 30, 1802121.        |
| Ag@CoxP                                 | 76.4                                | 310                                          | <i>ACS Catal.</i> 2018, 7, 7038-7042.        |
| Ni(OH) <sub>2</sub> -NP                 | 78.6                                | 260                                          | <i>ACS Nano</i> 2018, 12, 3875.              |
| 2D NiCoFe NSs/NF                        | 58                                  | 240                                          | <i>Nanoscale</i> 2018, 10, 12975.            |
| ANF@NW                                  | 103                                 | 382                                          | <i>Small</i> 2018, 14, 1800294.              |
| NF@Ni/C                                 | 54                                  | 265                                          | <i>Energy Environ. Sci.</i> 2018, 11, 2363.  |
| Co-Ni-B@NF                              | 120                                 | 313                                          | <i>J. Mater. Chem. A</i> 2017, 5, 12379.     |
| CoO-MoO <sub>2</sub>                    | 70                                  | 312                                          | <i>Adv. Funct. Mater.</i> 2017, 27, 1702324. |
| NiCoP/NF                                | 87                                  | 280                                          | <i>Nano Lett.</i> 2016, 16, 7718-7725.       |

**Table S2.** The concentration of AgNO<sub>3</sub> aqueous solution, immersion time, and the OER overpotential at 50 mA cm<sup>-2</sup> of different Ag@NiCo(OH)<sub>x</sub> /NF samples.

| Concentration of AgNO <sub>3</sub> (mM) | Immersion time (min) | Overpotential (mV)<br>@ 50 mA cm <sup>-2</sup> |
|-----------------------------------------|----------------------|------------------------------------------------|
| 10                                      | 30                   | 307                                            |
| 50                                      | 30                   | 280                                            |
| 50                                      | 10                   | 302                                            |
| 50                                      | 60                   | 291                                            |
| 100                                     | 30                   | 289                                            |

**Table S3.** Comparison of the UOR performance of Ag@NiCo(OH)<sub>x</sub>/NF with other reported electrocatalysts.

| Catalysts                             | Electrolyte           | Potential<br>at 10 mA cm <sup>-2</sup> | References                                            |
|---------------------------------------|-----------------------|----------------------------------------|-------------------------------------------------------|
| Ag@NiCo(OH) <sub>x</sub> /NF          | 1 M KOH + 0.33 M urea | <b>1.24</b>                            | <b>This work</b>                                      |
| CoFeCr LDH/NF                         | 1 M KOH + 0.33 M urea | 1.305                                  | <i>Appl. Catal. B: Environ.</i> , 2020, 272, 1189596. |
| C-350                                 | 1 M KOH + 0.33 M urea | 1.337                                  | <i>ACS Sustainable Chem. Eng.</i> 2020, 8, 7414.      |
| NiCo <sub>2</sub> S <sub>4</sub>      | 1 M KOH + 0.33 M urea | 1.32                                   | <i>ACS Sustainable Chem. Eng.</i> 2018, 6, 5011.      |
| Fe-Ni <sub>3</sub> S <sub>2</sub> /NF | 1 M KOH + 0.33 M urea | 1.44                                   | <i>J. Mater. Chem. A</i> , 2018, 6, 4346.             |
| Ni-MOF                                | 1 M KOH + 0.33 M urea | 1.36                                   | <i>Chem. Commun.</i> 2017, 53, 10906.                 |
| Ni(OH) <sub>2</sub>                   | 1 M KOH + 0.33 M urea | 1.38                                   | <i>Angew. Chem. Int. Ed.</i> 2016, 55, 12465.         |
